# Supplementary material for: Nicotinic Acid Adenine Dinucleotide Phosphate (NAADP)-Mediated Calcium Signaling Is Active in Memory CD4+ T Cells
Source: MDPI journal article supplement (doi:10.3390/molecules29040907), 2024-02-19
Supplement: s1 [file s1]

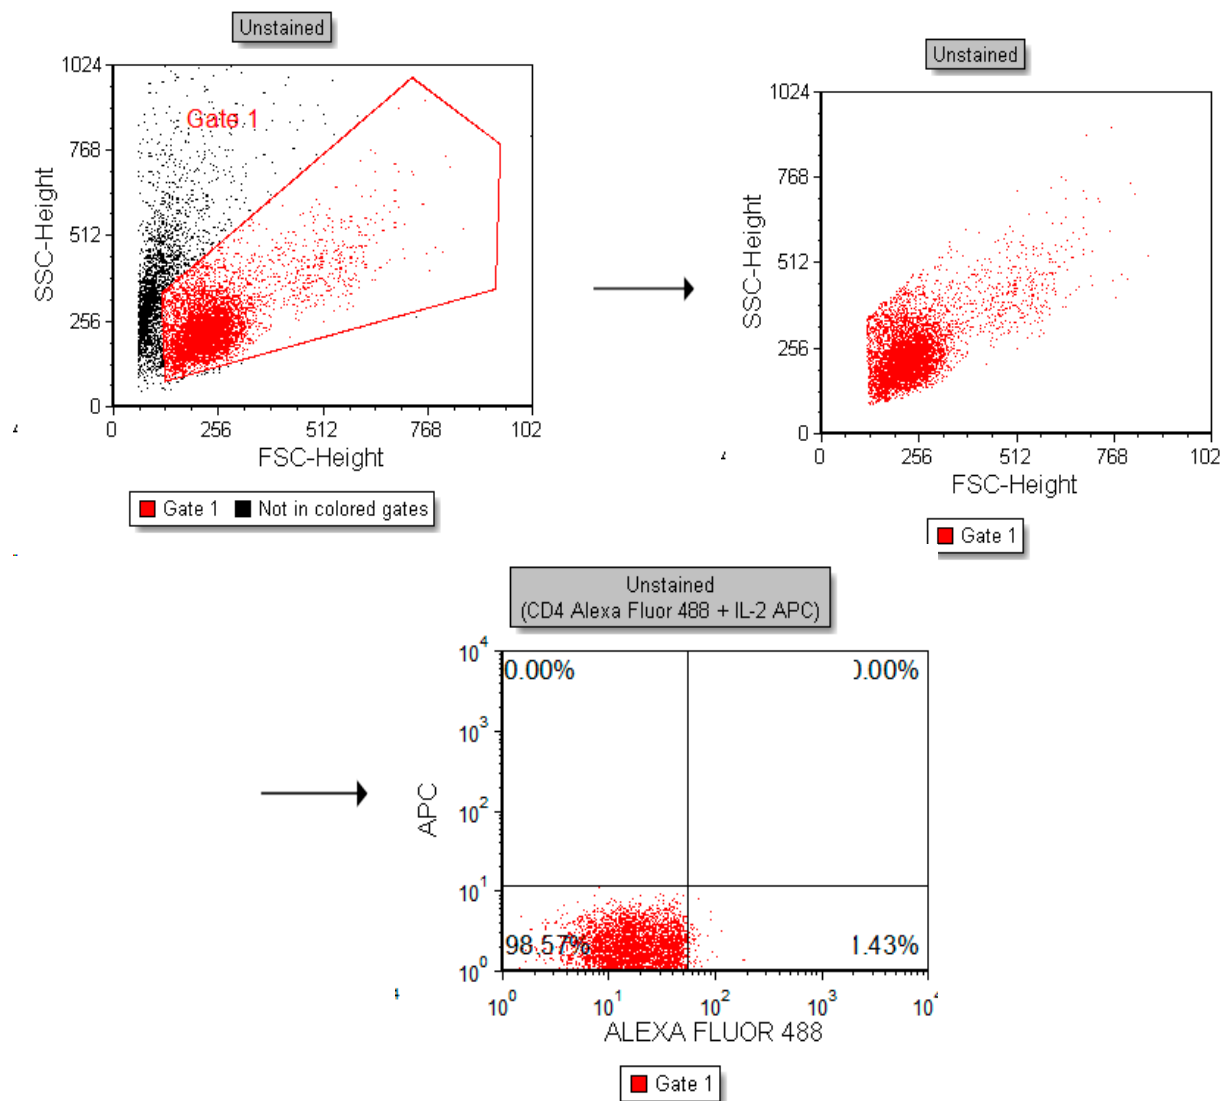

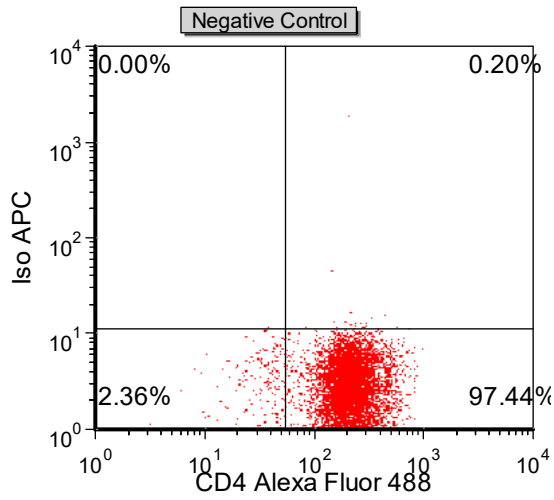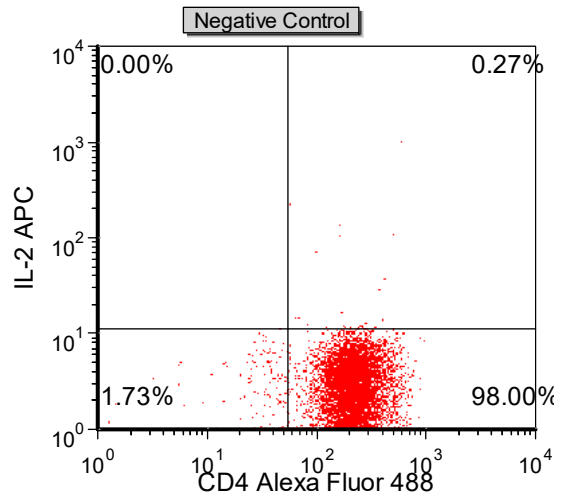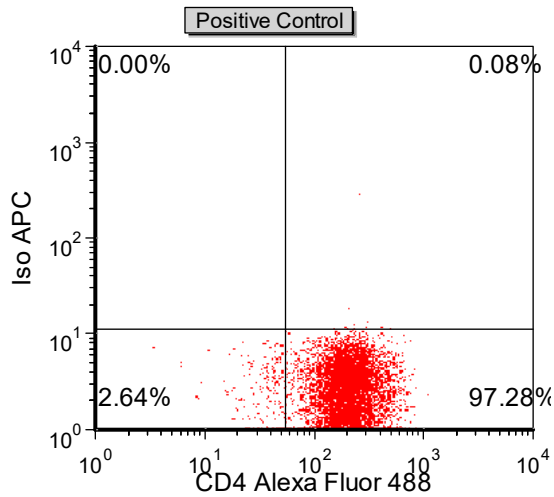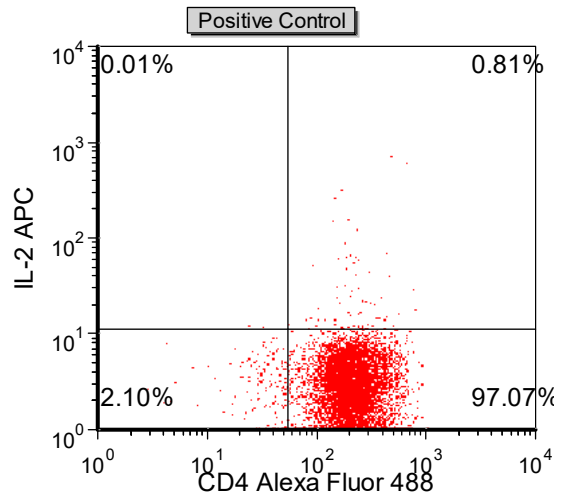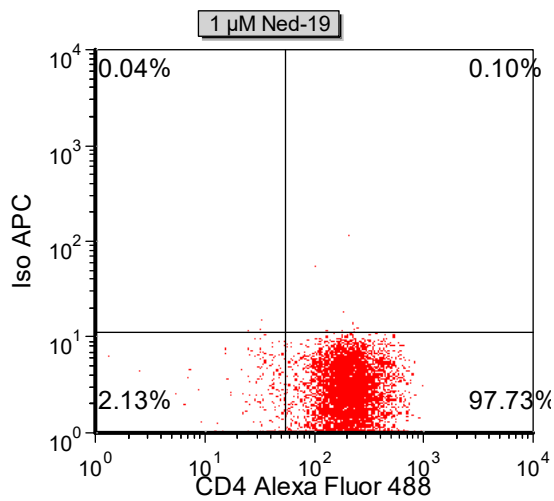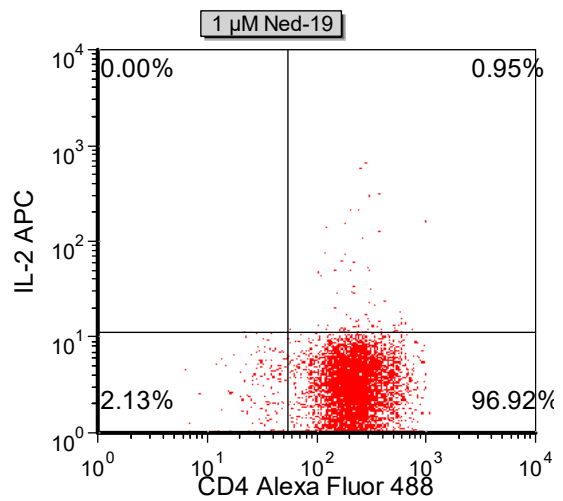

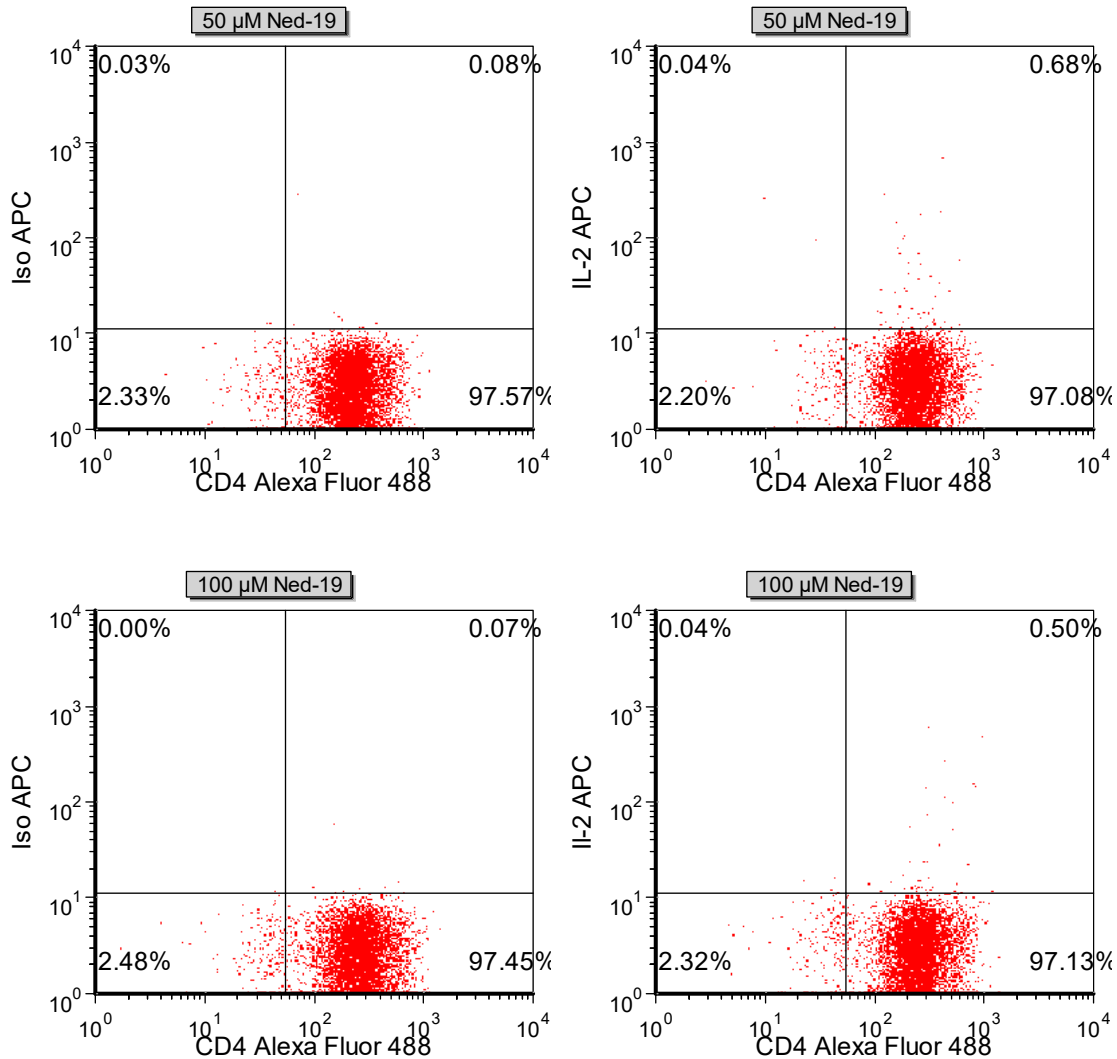

Figure S1. Flow cytometry gating and staining data for intracellular IL-2 production. Memory CD4<sup>+</sup> T cells were incubated for 1 hour with Ned-19/DMSO and then cells were stimulated by anti-mouse CD3 for 6.5 hours, followed by addition of 1000x Brefeldin A solution (1:1000) and again cells were stimulated for another 7.5 hours. Thereafter intracellular IL-2 staining was done after fixation and permeabilization with anti-CD4 AlexaFluor 488 and APC anti-mouse IL-2 or APC isotype control. Negative control cells were not stimulated by anti-CD3.
